# Supplementary material
Source: Springer Nature journal article supplement (https://www.springermedizin.de/resource/supplementary/12990_2010_314_MOESM2_ESM.pdf/9613012)

**a**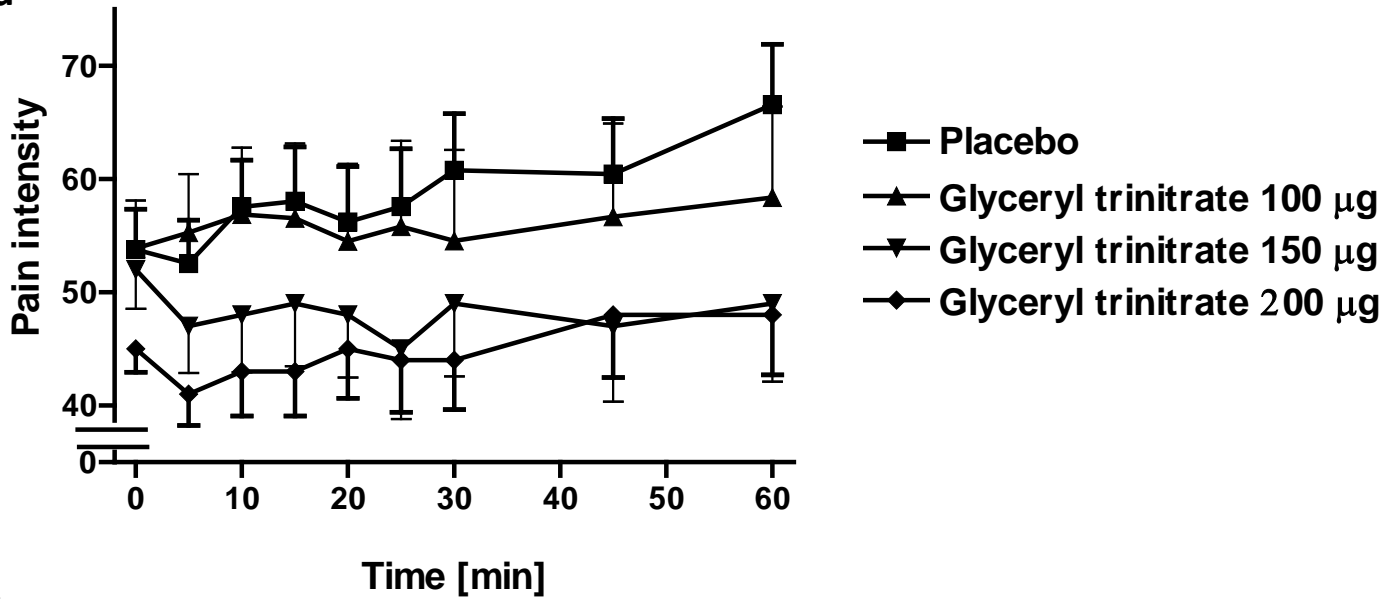**b**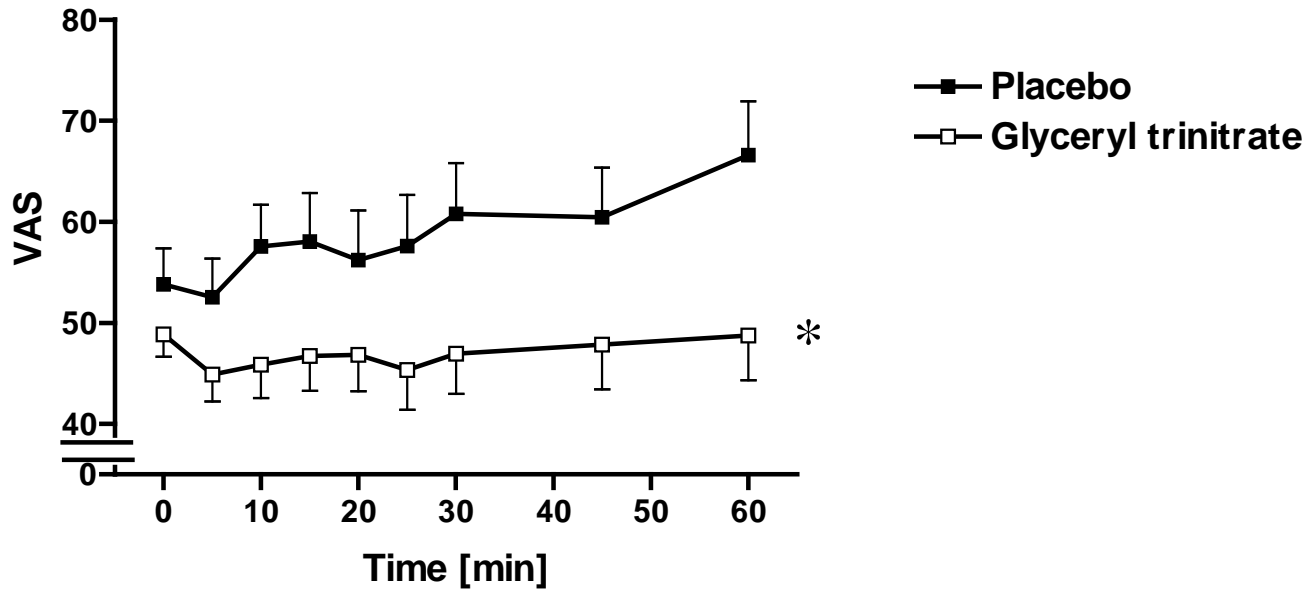**c**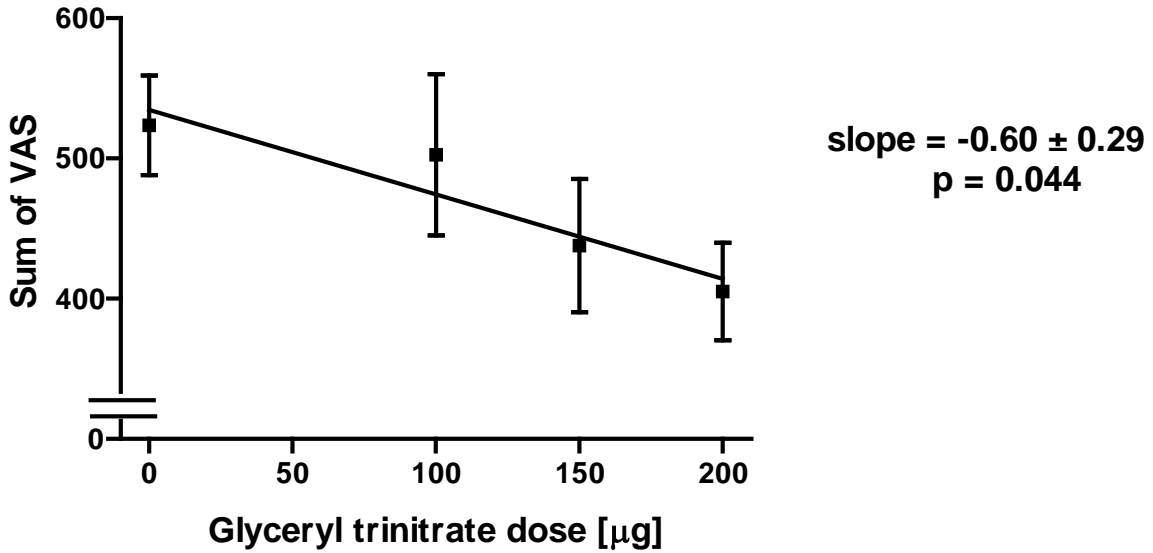

Supplement: MOESM2 [file 9613012]
